# Supplementary material
Source: publisher site journal article supplement (https://www.dovepress.com/article/70173)
Supplement: Supplementary file 1 [file get_supplementary_file.php]

### **Supplemental 1: PubMed Search Strategy**

("transients and migrants"[mesh] OR Transient[tiab] OR Transients[tiab] OR transient[ot] OR transients[ot] OR migrant[tiab] OR migrants[tiab] OR migrant[ot] OR migrants[ot] OR Nonmigrants[tiab] OR Nonmigrant[tiab] OR Squatters[tiab] OR Squatter[tiab] OR Nomads[tiab] OR Nomad[tiab] OR Nonmigrants[ot] OR Nonmigrant[ot] OR Squatters[ot] OR Squatter[ot] OR Nomads[ot] OR Nomad[ot] OR "Emigrants and Immigrants"[mesh] OR Immigrants[tiab] OR Immigrant[tiab] OR Foreigners[tiab] OR Foreigner[tiab] OR Aliens[tiab] OR Alien[tiab] OR Emigrants[tiab] OR Emigrant[tiab] OR Immigrants[ot] OR Immigrant[ot] OR Foreigners[ot] OR Foreigner[ot] OR Aliens[ot] OR Alien[ot] OR Emigrants[ot] OR Emigrant[ot])) OR ("Emigration and Immigration"[mesh])) OR (Emigration[tiab] OR Emigrations[tiab] OR Migration[tiab] OR Migrations[tiab] OR Immigration[tiab] OR Immigrations[tiab] OR Emigration[ot] OR Migration[ot] OR Migrations[ot] OR Immigration[ot]))

AND

(undocumented OR illegal OR illegals OR citizen OR citizens OR citizenship OR documentation OR deportation OR transnational)

AND

("health services accessibility"[MeSH Terms] OR (Access\*[all fields] AND (health\*[all fields] OR "health care"[all fields]))

AND

"last 10 years"[PDat] AND English[lang])

## Supplemental 2: Reviewed Articles

| Article | Title                                                                                                                                        | First Author, year, reference                                           | Sample # and Type          | Methods                                      | Country                      |
|---------|----------------------------------------------------------------------------------------------------------------------------------------------|-------------------------------------------------------------------------|----------------------------|----------------------------------------------|------------------------------|
| 1       | Committee opinion no. 627: health care for unauthorized immigrants                                                                           | ACOG Committee on health care for underserved women, 2015 <sup>35</sup> | N/A                        | N/A                                          | USA                          |
| 2       | ACOG Committee Opinion No. 425: health care for undocumented immigrants                                                                      | ACOG committee on healthcare for underserved women., 2009 <sup>48</sup> | N/A                        | N/A                                          | USA                          |
| 3       | How do tougher immigration measures affect unauthorized immigrants?                                                                          | Amuedo-Dorantes, C., 2013 <sup>43</sup>                                 | 947 immigrants             | cross-sectional probability survey           | USA                          |
| 4       | Is health a labour, citizenship or human right? Mexican seasonal agricultural workers in Leamington, Canada                                  | Barnes, N., 2013 <sup>31</sup>                                          | 1 country                  | comparative case study                       | Canada                       |
| 5       | Access to healthcare and alternative health-seeking strategies among undocumented migrants in Denmark                                        | Biswas, D., 2011 <sup>24</sup>                                          | 10 immigrants, 4 ED nurses | interviews                                   | Denmark                      |
| 6       | Access to health care for undocumented migrants from a human rights perspective: a comparative study of Denmark, Sweden, and The Netherlands | Biswas, D., 2012 <sup>8</sup>                                           | 3 countries                | review of laws, policies and grey literature | Denmark, Netherlands, Sweden |
| 7       | Access to health services for undocumented immigrants in Apulia                                                                              | Brindicci, G, 2015 <sup>74</sup>                                        | 272 immigrants             | questionnaire                                | Italy                        |
| 8       | A comparison of health access between permanent residents, undocumented immigrants and refugee claimants in Toronto, Canada                  | Campbell, R.M., 2014 <sup>63</sup>                                      | 21 immigrants              | semi structured interviews                   | Canada                       |

|    |                                                                                                                                                      |                                    |                                                                                    |                                                   |             |
|----|------------------------------------------------------------------------------------------------------------------------------------------------------|------------------------------------|------------------------------------------------------------------------------------|---------------------------------------------------|-------------|
| 9  | Eating and Feeding at the Margins of the State: Barriers to Health Care for Undocumented Migrant Women and the "Clinical" Aspects of Food Assistance | Carney, M.A., 2015 <sup>36</sup>   | 25 undocumented mexican women                                                      | interviews, focus groups, dietary surveys         | USA         |
| 10 | Implications for case management: ensuring access and delivery of quality health care to undocumented immigrant populations                          | Carr, D.D., 2006 <sup>59</sup>     | N/A                                                                                | overview and guidance for practice                | USA         |
| 11 | Illegality as risk factor: a survey of unauthorized migrant patients in a Berlin clinic                                                              | Castanãda, H., 2009 <sup>49</sup>  | 183 patients                                                                       | case study qualitative                            | Germany     |
| 12 | No me ponian mucha importancia: care-seeking experiences of undocumented Mexican immigrant women with chronic illness                                | Chandler, J.T., 2012 <sup>19</sup> | 26 undocumented immigrant women                                                    | ethnographic model                                | USA         |
| 13 | Undocumented immigrants and their use of medical services in Orange County, California                                                               | Chavez, L.R., 2012 <sup>27</sup>   | 764 immigrants                                                                     | survey                                            | USA         |
| 14 | Care of undocumented-uninsured immigrants in a large urban dialysis unit                                                                             | Chernin, G, 2012 <sup>22</sup>     | 92 patients                                                                        | comparison of undocumented and age matched cohort | Israel      |
| 15 | Right of access to health care for undocumented migrants in EU: a comparative study of national policies                                             | Cuadra, C.B., 2012 <sup>4</sup>    | 27 states of the EU                                                                | suvey                                             | EU          |
| 16 | Sociocultural and structural barriers to care among undocumented Latino immigrants with HIV infection                                                | Dang, B., 2012 <sup>64</sup>       | 22 undocumented immigrants with HIV                                                | in depth interviews                               | USA         |
| 17 | Social networks, information and health care utilization: evidence from undocumented immigrants in Milan                                             | Devillanova, C., 208 <sup>72</sup> | 10,254 undocumented immigrants presenting for care at one health services provider | interviews                                        | Italy       |
| 18 | Health care seeking among detained undocumented migrants: a cross-sectional study                                                                    | Dorn, T., 2011 <sup>28</sup>       | 173 immigrants in detention                                                        | interviews and nurse assessments                  | Netherlands |

|    |                                                                                                                                            |                                              |                                                                |                                                                  |                                                           |
|----|--------------------------------------------------------------------------------------------------------------------------------------------|----------------------------------------------|----------------------------------------------------------------|------------------------------------------------------------------|-----------------------------------------------------------|
| 19 | Health is hard here or "health for all"? The politics of blame, gender, and health care for undocumented Nicaraguan migrants in Costa Rica | Goldade, K., 2009 <sup>45</sup>              | 138 migrants and healthcare providers                          | field research (observations) and in depth interviews            | Costa rica                                                |
| 20 | Contacts between general practitioners and migrants without a residence permit and the use of "urgent" medical care                        | Goosens, M.C., 2011 <sup>67</sup>            | 61 MDs, 11 immigrants                                          | survey                                                           | Belgium                                                   |
| 21 | Health care for undocumented migrants; European approaches                                                                                 | Gray, B., 2012 <sup>44</sup>                 | N/A                                                            | comparison of the USA and EU                                     | Europe - Wide                                             |
| 22 | Access to health care for undocumented migrants: a comparative policy analysis of England and the Netherlands                              | Grit, K., 2012 <sup>1</sup>                  | 2 countries                                                    | analysis of policy papers and text and semistructured interviews | England and the Netherlands                               |
| 23 | Provider's perspectives on the impact of Immigration and Customs Enforcement (ICE) activity on immigrant health                            | Hacker, K., 2010 <sup>13</sup>               | 156 providers                                                  | survey                                                           | USA                                                       |
| 24 | The impact of Immigration and Customs Enforcement on immigrant health: perceptions of immigrants in Everett, Massachusetts, USA            | Hacker, K., 2011 <sup>2</sup>                | 52 immigrants                                                  | focus groups                                                     | USA                                                       |
| 25 | A call for further research on the impact of state-level immigration policies on public health                                             | Hardy, L.J., 2012                            | 37 community members, 12 stakeholders and 11 community leaders | focus groups and structured interviews                           | USA                                                       |
| 26 | Diagnosis and treatment of tuberculosis in undocumented migrants in low- or intermediate-incidence countries                               | Heldal, E., 2008 <sup>51</sup>               | 28 countries                                                   | Questionnaires; literature research                              | Countries with low or intermediate tuberculosis incidence |
| 27 | The impact and implications of undocumented immigration on individual and collective health in the United States                           | Hilfinger Messias, D. K., 2015 <sup>39</sup> | N/A                                                            | overview of policies                                             | USA                                                       |
| 28 | Undocumented migration in the United States: an overview of historical and current policy contexts                                         | Hilfinger Messias, D. K., 2015 <sup>38</sup> | N/A                                                            | overview of policies                                             | USA                                                       |

|    |                                                                                                                                                                                                     |                                           |                                                          |                                                   |                             |
|----|-----------------------------------------------------------------------------------------------------------------------------------------------------------------------------------------------------|-------------------------------------------|----------------------------------------------------------|---------------------------------------------------|-----------------------------|
| 29 | The impact of new health insurance coverage on undocumented and other low-income children: lessons from three California counties                                                                   | Howell, E., 2010 <sup>46</sup>            | 4000 families in 3 cities                                | surveys                                           | USA                         |
| 30 | Providing medical care for undocumented migrants in Denmark: what are the challenges for health professionals?                                                                                      | Jensen, N.K., 2011 <sup>29</sup>          | 12 providers                                             | interviews                                        | Denmark                     |
| 31 | Use of an emergency department in Saint-Laurent du Maroni, French Guiana: does being undocumented make a difference?                                                                                | Jolivet, A., 2014 <sup>42</sup>           | 177 patients                                             | cross-sectional, observational survey             | French Guiana               |
| 32 | Sexual health is dead in my body: participatory assessment of sexual health determinants by refugees, asylum seekers and undocumented migrants in Belgium and The Netherlands                       | Keygnaert, I., 2014 <sup>73</sup>         | 223 refugees, asylum seekers and undocumented immigrants | in depth interviews                               | Belgium and the Netherlands |
| 33 | Prenatal care among immigrant and racial-ethnic minority women in a new immigrant destination: exploring the impact of immigrant legal status                                                       | Korinek, K., 2011 <sup>30</sup>           | 392,208 pregnant women                                   | analysis of existing data                         | USA                         |
| 34 | Intangible obstacles: health implications of stigmatization, structural violence, and fear among undocumented immigrants in France                                                                  | Larchanche, S., 2012 <sup>20</sup>        | 2 organization and 3 reports                             | observational study and review                    | France                      |
| 35 | Fear of deportation is not associated with medical or dental care use among Mexican-origin farmworkers served by a federally-qualified health center--faith-based partnership: an exploratory study | Lopez-Cevallos, D. F., 2014 <sup>68</sup> | 179 farm workers                                         | Cross-sectional                                   | USA                         |
| 36 | Undocumented migrants in Canada: a scope literature review on health, access to services, and working conditions                                                                                    | Magalhaes, L., 2010 <sup>6</sup>          | 24 articles                                              | scope review of peer reviewed and grey literature | Canada                      |
| 37 | Fear of discovery among Latino immigrants presenting to the emergency department                                                                                                                    | Maldonado, C. Z., 2013 <sup>69</sup>      | 1007 patients                                            | semi-structured survey                            | USA                         |
| 38 | Health status and access to health care of documented and undocumented immigrant Latino women                                                                                                       | Marshall, K <sup>60</sup>                 | 197 Latino women                                         | questionnaire                                     | USA                         |

|    |                                                                                                                             |                                       |                                                              |                                                                 |             |
|----|-----------------------------------------------------------------------------------------------------------------------------|---------------------------------------|--------------------------------------------------------------|-----------------------------------------------------------------|-------------|
| 39 | Evaluating the Impact of Immigration Policies on Health Status Among Undocumented Immigrants: A Systematic Review           | Martinez, O., 2013 <sup>16</sup>      | 40 articles selected                                         | systematic review                                               |             |
| 40 | Canada's non-status immigrants: negotiating access to health care and citizenship                                           | Miklavcic, A., 2011 <sup>25</sup>     | 1 case study                                                 | case study                                                      | Canada      |
| 41 | HIV testing behaviors among undocumented Central American immigrant women in Houston, Texas                                 | Montealegre, J.R., 2012 <sup>26</sup> | 182 undocumented individuals from central america            | survey                                                          | USA         |
| 42 | Undocumented and unprotected immigrant women and children in harm's way                                                     | Moynihan, B., 2008 <sup>50</sup>      | N/A                                                          | Overview of legal protections                                   | USA         |
| 43 | Access to healthcare for undocumented migrants with communicable diseases in Germany: a quantitative study                  | Mylius, M., 2015 <sup>32</sup>        | 384 local public health agencies                             | surveys                                                         | Germany     |
| 44 | Access to and use of health services among undocumented Mexican immigrants in a US urban area                               | Nandi, A., 2008 <sup>54</sup>         | 431 Mexican born immigrants                                  | interviews                                                      |             |
| 45 | Health care access, use of services, and experiences among undocumented Mexicans and other Latinos                          | Ortega, A.N., 2007 <sup>55</sup>      | 42, 044 persons in California                                | telephone interview                                             | USA         |
| 46 | Experiences among undocumented migrants accessing primary care in the United kingdom: a qualitative study                   | Poduval, S. 2015 <sup>37</sup>        | 16 undoumented migrants, 4 volunteer staff - qualitative     | semi-structured Interviews                                      | UK (London) |
| 47 | The impact of local immigration enforcement policies on the health of immigrant Hispanics/Latinos in the United States      | Rhodes, S. D., 2015 <sup>40</sup>     | 14 counties, 66 focus group participants and 17 interviewees | vital records (pre and post) analysis, focus groups, interviews | USA         |
| 48 | Perceived quality of care, receipt of preventive care, and usual source of health care among undocumented and other Latinos | Rodríguez, M.A., 2009 <sup>12</sup>   | 4013 latino adults                                           | telephone survey                                                | USA         |
| 49 | Health care access for refugees and immigrants with precarious status: public health and human right challenges             | Rousseau,C., 2008 <sup>52</sup>       | 20 health care professionals/individuas                      | semi-structured interviews                                      | Canada      |

|    |                                                                                                                                                                |                                           |                                                       |                                                                         |               |
|----|----------------------------------------------------------------------------------------------------------------------------------------------------------------|-------------------------------------------|-------------------------------------------------------|-------------------------------------------------------------------------|---------------|
| 50 | Health care utilisation and problems in accessing health care of female undocumented immigrants in the Netherlands                                             | Schoevers, M.A. , 2010 <sup>66</sup>      | 100 undocumented women immigrants                     | semi structured interviews                                              | netherlands   |
| 51 | Patient-held records for undocumented immigrants: a blind spot. A systematic review of patient-held records                                                    | Schoevers, M.A., 2009 <sup>75</sup>       | 42 articles                                           | systematic review                                                       | all           |
| 52 | Illegal female immigrants in The Netherlands have unmet needs in sexual and reproductive health                                                                | Schoevers, M.A., 2010 <sup>33</sup>       | 100 illegal females                                   | survey andd semi-structured interviews                                  | Netherlands   |
| 53 | Sexual and reproductive health behaviors of undocumented migrants in Geneva: a cross sectional study                                                           | Sebo, P., 2011 <sup>47</sup>              | 313 mostly latino-american working undocumented women | questionnaire                                                           | Switzerland   |
| 54 | Status and health security: an exploratory study of irregular immigrants in Toronto                                                                            | Simich, L., 2007 <sup>57</sup>            | 11 illegal immigrants                                 | qualitative interviews                                                  | Canada        |
| 55 | Stretching the safety net to serve undocumented immigrants: community responses to health needs                                                                | Staiti, A.B., 2006 <sup>61</sup>          | 12 nationally representative communities              | site visits                                                             | USA           |
| 56 | Health insurance and access to care for families with young children in California, 2001-2005: differences by immigration status                               | Stevens, G.D., 2010 <sup>53</sup>         | 37,226 families                                       | telephone interview                                                     | USA           |
| 57 | The right of access to health care for undocumented migrants: a revision of comparative analysis in the European context                                       | Suess, A., 2014 <sup>65</sup>             | 27 publications                                       | review bibliography, review document, document selection given criteria | Europe - Wide |
| 58 | Mental health problems of undocumented migrants (UMs) in The Netherlands: a qualitative exploration of help-seeking behavior and experiences with primary care | Teunissen, E., 2014 <sup>41</sup>         | 15 undocumented migrants                              | qualitative - semi structured interviews                                | Netherlands   |
| 59 | Health care provision for illegal migrants: May health policy make a difference?                                                                               | Torres-Cantero, A.M., 2007 <sup>58</sup>  | 380 migrants, some legal and some illegal             | interviews, recruited from streets and health services                  | Spain         |
| 60 | Variations in healthcare access and utilization among Mexican immigrants: the role of documentation status                                                     | Vargas Bustamante, A., 2012 <sup>34</sup> | 3,638 immigrants                                      | California survey                                                       | USA           |

|    |                                                                                                    |                                  |                                                      |                             |               |
|----|----------------------------------------------------------------------------------------------------|----------------------------------|------------------------------------------------------|-----------------------------|---------------|
| 61 | Improving access to health care for undocumented immigrants in the United States                   | Wallace, S.P. 2013 <sup>23</sup> | 30 Mexican immigrants mostly undocumented            | focus groups                | USA           |
| 62 | A study of HIV positive undocumented African migrants' access to health services in the UK         | Whyte, J <sup>62</sup>           | 16 workers at NGOs that assist undocumented migrants | qualitative interviews      | UK            |
| 63 | Health care and illegality: a survey of undocumented pregnant immigrants in Geneva                 | Wolff, H., 2005 <sup>56</sup>    | 134 pregnant undocumented women                      | questionnaire               | Switzerland   |
| 64 | Undocumented migrants lack access to pregnancy care and prevention                                 | Wolff, H., 2008 <sup>70</sup>    | 161 undocumented women and 233 control               | prospective cohort study    | switzerland   |
| 65 | Health and access to care for undocumented migrants living in the European Union: a scoping review | Woodward, A., 2014 <sup>7</sup>  | 54 sources identified                                | scoping review              | Europe - Wide |
| 66 | Healthcare for the undocumented: solving a public health crisis in the U.S                         | Zuber, J., 2012 <sup>71</sup>    | N/A                                                  | legal review and case study | USA           |
